# Supplementary material
Source: MDPI journal article supplement (https://www.mdpi.com/2071-1050/14/16/10418)
Supplement: s1 [file s1]

## Supplementary materials

### Stakeholders' impact factors on sustainable mixed development projects during the COVID-19 pandemic: A systematic review and meta-analysis

Table S1 shows the impact factors of stakeholders in construction projects, namely stakeholder engagement, stakeholder involvement, stakeholder relationship, stakeholder attributes, stakeholder influence, stakeholder interest, stakeholder needs, stakeholder satisfaction, stakeholder expectation and stakeholder behaviour, which can influence the success of managing mixed development projects during the COVID -19 pandemic to achieve the SDG 11. The highlighted columns show the top three highest frequency of the impact factors.

**Table S1.** Stakeholders' impact factors on sustainable mixed development projects during the COVID-19 pandemic

| Reference                           | Stakeholders Impact    |                         |                          |                        |                       |                      |                   |                          |                         |                       |
|-------------------------------------|------------------------|-------------------------|--------------------------|------------------------|-----------------------|----------------------|-------------------|--------------------------|-------------------------|-----------------------|
|                                     | Stakeholder Engagement | Stakeholder Involvement | Stakeholder Relationship | Stakeholder Attributes | Stakeholder Influence | Stakeholder Interest | Stakeholder Needs | Stakeholder Satisfaction | Stakeholder Expectation | Stakeholder Behaviour |
| Araya and Sierra (2021) [61]        | ✓                      |                         | ✓                        |                        |                       |                      |                   |                          |                         |                       |
| Althaidi et al. (2021) [81]         | ✓                      | ✓                       | ✓                        | ✓                      | ✓                     | ✓                    | ✓                 |                          | ✓                       |                       |
| Herath and Chong (2021) [66]        |                        | ✓                       |                          |                        | ✓                     | ✓                    | ✓                 | ✓                        |                         | ✓                     |
| Iqbal et al. (2021) [89]            | ✓                      |                         | ✓                        |                        |                       |                      |                   |                          |                         | ✓                     |
| Khohar et al. (2021) [90]           |                        |                         | ✓                        | ✓                      |                       |                      |                   |                          |                         | ✓                     |
| Klaus-Rosińska and Iwko (2021) [29] | ✓                      | ✓                       |                          |                        | ✓                     |                      | ✓                 | ✓                        | ✓                       |                       |
| Leon and Laing (2021) [91]          | ✓                      | ✓                       | ✓                        |                        |                       |                      |                   |                          |                         |                       |
| Muntu et al. (2021) [84]            |                        |                         | ✓                        |                        |                       |                      | ✓                 | ✓                        |                         |                       |
| Oke et al. (2021) [92]              | ✓                      |                         |                          |                        |                       |                      |                   |                          |                         | ✓                     |
| Rui et al. (2021) [93]              | ✓                      | ✓                       |                          |                        |                       |                      |                   |                          | ✓                       |                       |
| Inga et al. (2020) [94]             | ✓                      |                         | ✓                        |                        |                       |                      |                   | ✓                        |                         |                       |
| Lee et al. (2020) [95]              | ✓                      | ✓                       |                          |                        | ✓                     | ✓                    |                   |                          |                         |                       |
| Maqbool et al. (2020) [82]          |                        |                         |                          |                        |                       |                      |                   | ✓                        |                         |                       |
| Safapour et al. (2020) [96]         | ✓                      | ✓                       |                          |                        |                       |                      |                   |                          |                         |                       |
| Wuni and Shen (2020) [97]           | ✓                      | ✓                       |                          |                        |                       |                      |                   |                          | ✓                       |                       |
| Deep et al. (2019) [98]             |                        |                         | ✓                        | ✓                      |                       |                      |                   |                          |                         | ✓                     |
| Lin et al. (2019) [79]              |                        |                         |                          | ✓                      | ✓                     |                      |                   |                          |                         | ✓                     |

Table S1. Cont.

| Reference                             | Stakeholders Impact    |                         |                          |                        |                       |                      |                   |                          |                         |                       |
|---------------------------------------|------------------------|-------------------------|--------------------------|------------------------|-----------------------|----------------------|-------------------|--------------------------|-------------------------|-----------------------|
|                                       | Stakeholder Engagement | Stakeholder Involvement | Stakeholder Relationship | Stakeholder Attributes | Stakeholder Influence | Stakeholder Interest | Stakeholder Needs | Stakeholder Satisfaction | Stakeholder Expectation | Stakeholder Behaviour |
| Magassouba et al. (2019) [65]         | √                      | √                       |                          | √                      | √                     | √                    |                   |                          |                         |                       |
| Silvius and Schipper (2019) [70]      | √                      | √                       | √                        | √                      | √                     | √                    | √                 | √                        |                         | √                     |
| Tabassi et al. (2019) [71]            |                        |                         | √                        | √                      |                       |                      |                   |                          |                         | √                     |
| Yu et al. (2019) [73]                 | √                      | √                       |                          | √                      | √                     | √                    | √                 |                          |                         |                       |
| Alqaisi (2018) [67]                   | √                      |                         | √                        | √                      |                       | √                    | √                 |                          | √                       |                       |
| Asma and Sunny (2018) [72]            | √                      | √                       | √                        | √                      | √                     | √                    | √                 | √                        | √                       |                       |
| Batistič and Kenda (2018) [99]        | √                      |                         | √                        |                        |                       |                      |                   |                          |                         |                       |
| Dağlı (2018) [48]                     |                        | √                       |                          |                        | √                     | √                    | √                 |                          | √                       |                       |
| Marleno et al. (2018) [8]             |                        | √                       | √                        | √                      | √                     |                      | √                 |                          |                         |                       |
| Bizon-Górecka and Górecki (2017) [69] | √                      | √                       | √                        |                        | √                     |                      |                   |                          |                         |                       |
| Davis (2017) [100]                    | √                      | √                       |                          | √                      |                       |                      | √                 |                          | √                       |                       |
| Liang et al. (2017) [22]              |                        |                         | √                        |                        | √                     |                      |                   |                          |                         |                       |
| Akeyo Forsman (2017)[86]              | √                      | √                       | √                        | √                      | √                     | √                    | √                 | √                        | √                       |                       |
| Oppong et al. (2017) [83]             |                        | √                       | √                        | √                      |                       |                      |                   | √                        |                         |                       |
| Rathenam and Dabup (2017) [36]        | √                      | √                       | √                        | √                      | √                     |                      |                   | √                        |                         |                       |
| Donkoh and Aboagye-Nimo (2016) [101]  | √                      | √                       |                          |                        | √                     |                      |                   |                          |                         |                       |
| Lückmann and Färber (2016) [102]      | √                      | √                       |                          |                        |                       |                      |                   |                          |                         | √                     |
| Eyiah-Botwe (2016) [80]               | √                      |                         | √                        | √                      | √                     | √                    | √                 | √                        | √                       | √                     |
| Leal Filho and Brandli (2016) [44]    | √                      | √                       | √                        |                        |                       |                      | √                 |                          |                         |                       |
| Assefaa et al. (2015) [103]           | √                      |                         |                          | √                      | √                     |                      |                   | √                        |                         |                       |
| Miller and Oliver (2015) [104]        | √                      | √                       | √                        |                        | √                     |                      |                   |                          |                         |                       |
| Olaku et al. (2015) [105]             |                        |                         |                          | √                      |                       |                      | √                 | √                        | √                       |                       |

Table S1. Cont.

| Reference                             | Stakeholders Impact    |                         |                          |                        |                       |                      |                   |                          |                         |                       |
|---------------------------------------|------------------------|-------------------------|--------------------------|------------------------|-----------------------|----------------------|-------------------|--------------------------|-------------------------|-----------------------|
|                                       | Stakeholder Engagement | Stakeholder Involvement | Stakeholder Relationship | Stakeholder Attributes | Stakeholder Influence | Stakeholder Interest | Stakeholder Needs | Stakeholder Satisfaction | Stakeholder Expectation | Stakeholder Behaviour |
| Serrador and Turner (2015) [106]      |                        |                         |                          |                        |                       |                      |                   | ✓                        |                         |                       |
| Zidane et al. (2015) [107]            |                        | ✓                       | ✓                        | ✓                      | ✓                     | ✓                    | ✓                 |                          | ✓                       | ✓                     |
| Rajablu et al. (2015) [77]            |                        |                         | ✓                        | ✓                      |                       | ✓                    |                   |                          |                         |                       |
| Ramel (2014) [108]                    |                        |                         |                          |                        |                       |                      | ✓                 |                          | ✓                       |                       |
| Yang et al. (2014) [109]              | ✓                      | ✓                       | ✓                        | ✓                      | ✓                     | ✓                    | ✓                 | ✓                        | ✓                       | ✓                     |
| Xie et al. (2014) [110]               | ✓                      | ✓                       |                          |                        | ✓                     |                      |                   |                          |                         |                       |
| Beringer et al. (2013) [78]           | ✓                      | ✓                       |                          |                        |                       | ✓                    |                   |                          |                         | ✓                     |
| Eslerod and Hue-mann (2013) [111]     |                        |                         |                          |                        |                       | ✓                    | ✓                 | ✓                        | ✓                       |                       |
| Li et al. (2013) [112]                | ✓                      |                         |                          | ✓                      | ✓                     |                      |                   | ✓                        |                         |                       |
| Chandr et al. (2012) [62]             | ✓                      | ✓                       | ✓                        | ✓                      | ✓                     | ✓                    |                   |                          |                         |                       |
| Ng et al. (2012) [113]                | ✓                      | ✓                       | ✓                        |                        |                       | ✓                    |                   |                          | ✓                       |                       |
| Zanjirchi and Moradi (2012) [114]     |                        | ✓                       |                          |                        | ✓                     |                      |                   |                          |                         |                       |
| Assudani and Kloppenborg (2010) [115] | ✓                      |                         | ✓                        | ✓                      |                       |                      |                   | ✓                        | ✓                       |                       |
| Yang et al. (2011) [116]              | ✓                      |                         | ✓                        | ✓                      |                       | ✓                    | ✓                 | ✓                        |                         | ✓                     |
| Nguyen et al. (2009) [75]             |                        |                         |                          | ✓                      |                       | ✓                    |                   | ✓                        |                         |                       |
| Yang et al. (2009) [63]               | ✓                      |                         | ✓                        | ✓                      |                       | ✓                    | ✓                 |                          |                         | ✓                     |
| <b>Frequency (Nos.)</b>               | <b>37</b>              | <b>31</b>               | <b>31</b>                | <b>28</b>              | <b>25</b>             | <b>21</b>            | <b>21</b>         | <b>19</b>                | <b>17</b>               | <b>16</b>             |
| <b>Frequency Percentage (%)</b>       | <b>67.3</b>            | <b>56.4</b>             | <b>56.4</b>              | <b>50.9</b>            | <b>45.5</b>           | <b>38.2</b>          | <b>38.2</b>       | <b>34.5</b>              | <b>30.9</b>             | <b>29.1</b>           |
